# Supplementary material for: Effects of Inflammatory Factor Expression Regulated by 12/15 Lipoxygenase on Obesity-Related Nephropathy
Source: MDPI journal article supplement (doi:10.3390/nu14132743), 2022-06-30
Supplement: s1 [file s1]

Figure S1

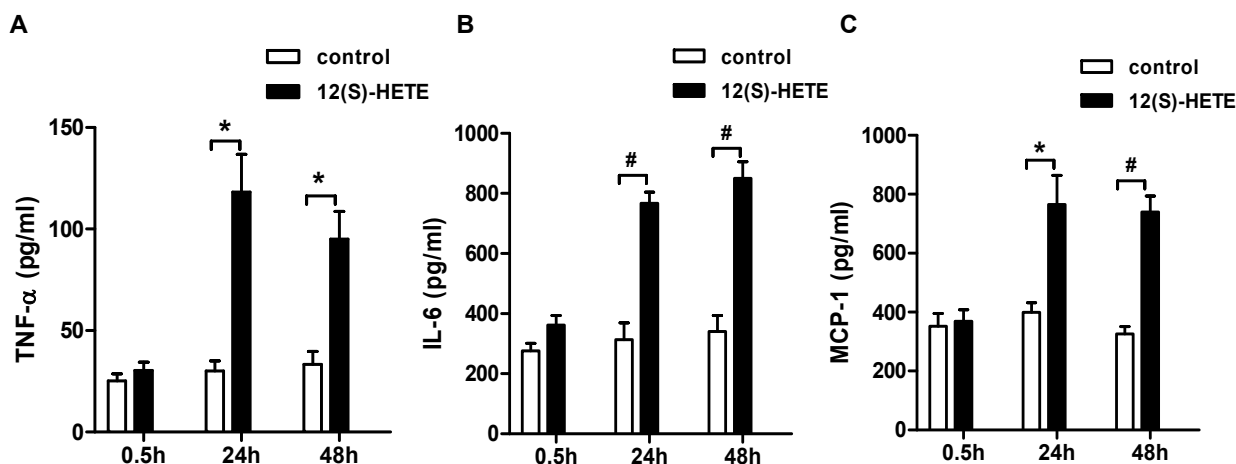

Figure S1. Effects of 12(S)-HETE on the production of adipose inflammatory factors. Equal numbers of subconfluent MCs were cultured in medium (RPMI1640+1%FBS) containing either buffer (control) or 12(S)-HETE ( $10^{-7}$ M) for 0.5–48 h. An aliquot supernatant was collected from each well and content of TNF- $\alpha$  (A), IL-6 (B), and MCP-1 (C) were measured by ELISA kits. Results are from three sets of experiments and shown as fold over control (mean $\pm$ SEM, n=3. \*p<0.05, #p<0.01 vs. control).

Figure S2

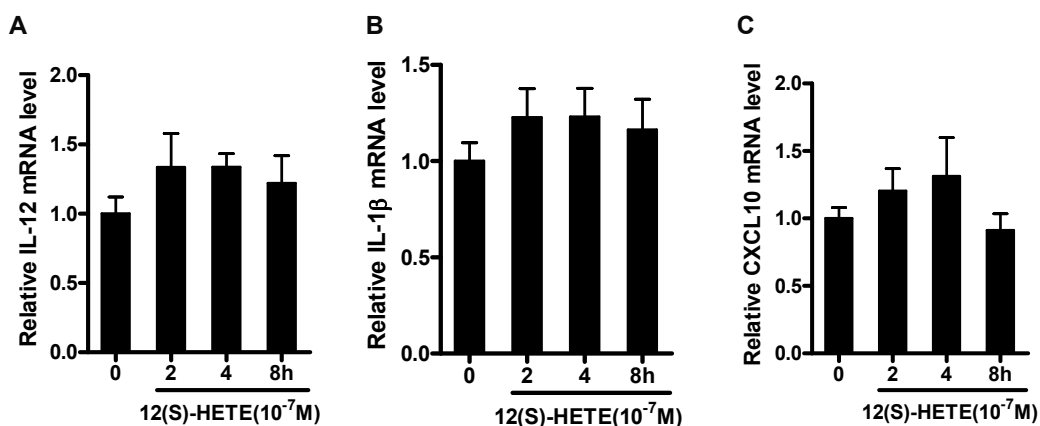

Figure S2. Effects of 12(S)-HETE on the expression of adipose inflammatory factors. MCs were stimulated with 12(S)-HETE ( $10^{-7}$ M) for 2–8 h and changes in intracellular mRNA levels of IL-12 (A), IL-1 $\beta$  (B), and CXCL-10 (C) were measured by RT-qPCR. Results are expressed as fold over none treatment of control (mean $\pm$ SEM, n=3).

Figure S3

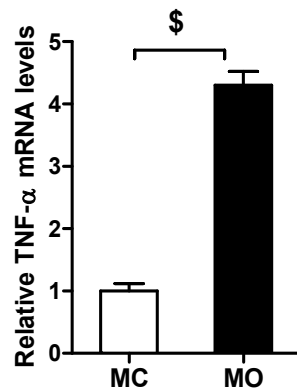

Figure S3. Quiescent MCs and MOs were collected for experiment. Intracellular mRNA expression of TNF- $\alpha$  was measured by RT-qPCR,  $\beta$ -Actin was used as internal control. Results are expressed as fold over MCs (mean $\pm$ SEM, n=3. \$p<0.001 vs. MC).

Figure S4

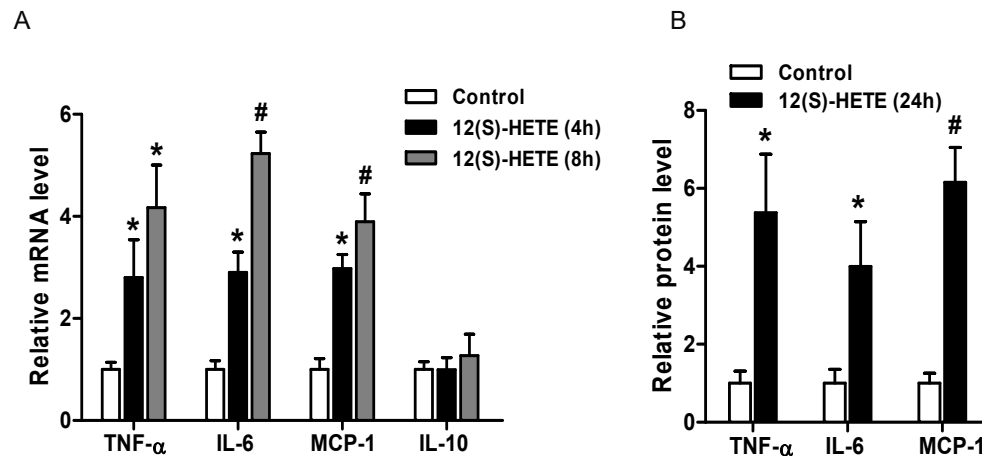

Figure S4. Effects of 12(S)-HETE on the expression of adipose inflammatory factors in MOs. (A) Quiescent MOs (RAW264.7) were stimulated with 12(S)-HETE ( $10^{-7}$ M) for 4–8 h and changes in intracellular mRNA levels of TNF- $\alpha$ , IL-6, MCP-1 and IL-10 were measured by RT-qPCR. Results are expressed as fold over none treatment of Control (mean $\pm$ SEM, n=3). (B) Equal numbers of subconfluent MOs were cultured in medium (DMEM+1%FBS) containing either buffer (Control) or 12(S)-HETE ( $10^{-7}$ M) for 24 h. An aliquot supernatant was collected from each well and content of TNF- $\alpha$ , IL-6, and MCP-1 were measured by ELISA kits. Results are from three sets of experiments and shown as fold over Control (mean $\pm$ SEM, n=3. \*p<0.05, #p<0.01 vs. Control).

**Table S1. Primer sequences used in RT-qPCR analysis**

| Primers (5'→3')  |                        |                       |
|------------------|------------------------|-----------------------|
| Gene (species)   | Sense                  | Anti-sense            |
| IL-1 $\beta$ (M) | TTGACGGACC CAAAAAG ATG | AGAAGGTGCTCATG TCCTCA |
| IL-12 (M)        | TCTGCAGAGAAGGTCACACT   | ATGAAGAAGCTGGTGCTGTA  |
| CXCL10 (M)       | CTCATCCTGCTGGGTCTGAG   | CCTATGGCCCTCATTCTCAC  |
| M, Mouse         |                        |                       |
